# Supplementary material for: SARS-CoV-2 ORF7a Mutation Found in BF.5 and BF.7 Sublineages Impacts Its Functions
Source: MDPI journal article supplement (doi:10.3390/ijms25042351), 2024-02-16
Supplement: s1 [file s1]

# **SARS-CoV-2 ORF7a Mutation Found in BF.5 and BF.7 Sublineages Impacts Its Functions**

**Uddhav Timilsina<sup>1</sup>, Emily B. Ivey<sup>1</sup>, Sean Duffy<sup>1</sup>, Arnon Plianchaisuk<sup>2</sup>, The Genotype to Phenotype Japan (G2P-Japan) Consortium, Jumpei Ito<sup>2</sup>, Kei Sato<sup>2,3,4,5,6,7,8</sup> and Spyridon Stavrou<sup>1,\*</sup>**

<sup>1</sup> Department of Microbiology and Immunology, Jacobs School of Medicine and Biomedical Sciences, University at Buffalo, NY, United States

<sup>2</sup> Division of Systems Virology, Department of Microbiology and Immunology, The Institute of Medical Science, The University of Tokyo, Tokyo, Japan

<sup>3</sup> Graduate School of Medicine, The University of Tokyo, Tokyo, Japan

<sup>4</sup> International Research Center for Infectious Diseases, The Institute of Medical Science, The University of Tokyo, Tokyo, Japan

<sup>5</sup> Graduate School of Frontier Sciences, The University of Tokyo, Kashiwa, Japan

<sup>6</sup> International Vaccine Design Center, The Institute of Medical Science, The University of Tokyo, Tokyo, Japan

<sup>7</sup> Collaboration Unit for Infection, Joint Research Center for Human Retrovirus infection, Kumamoto University, Kumamoto, Japan

<sup>8</sup> CREST, Japan Science and Technology Agency, Kawaguchi, Japan

\* Correspondence: stavrou2@buffalo.edu

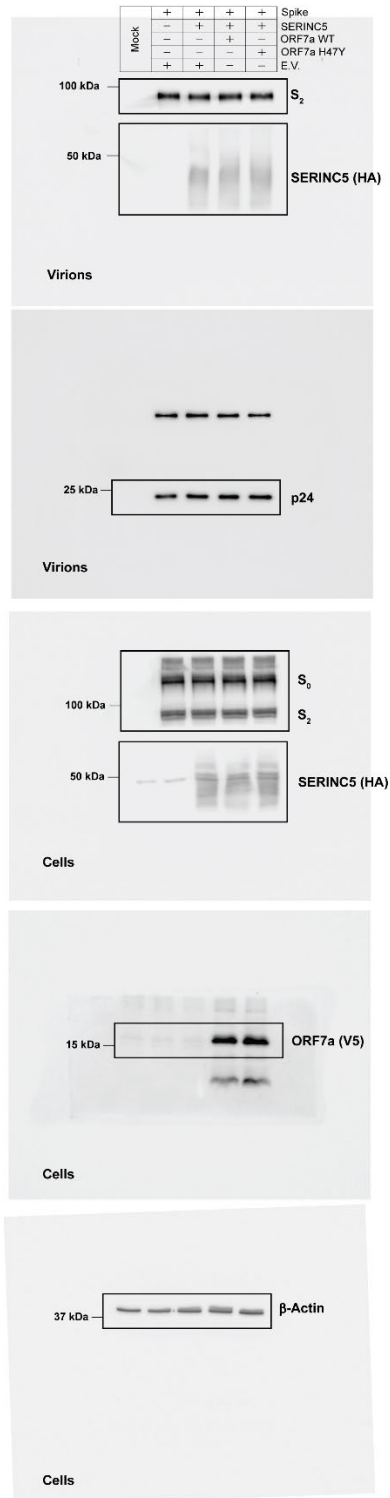

**Figure S1: Uncropped immunoblot images for Figure 2.**

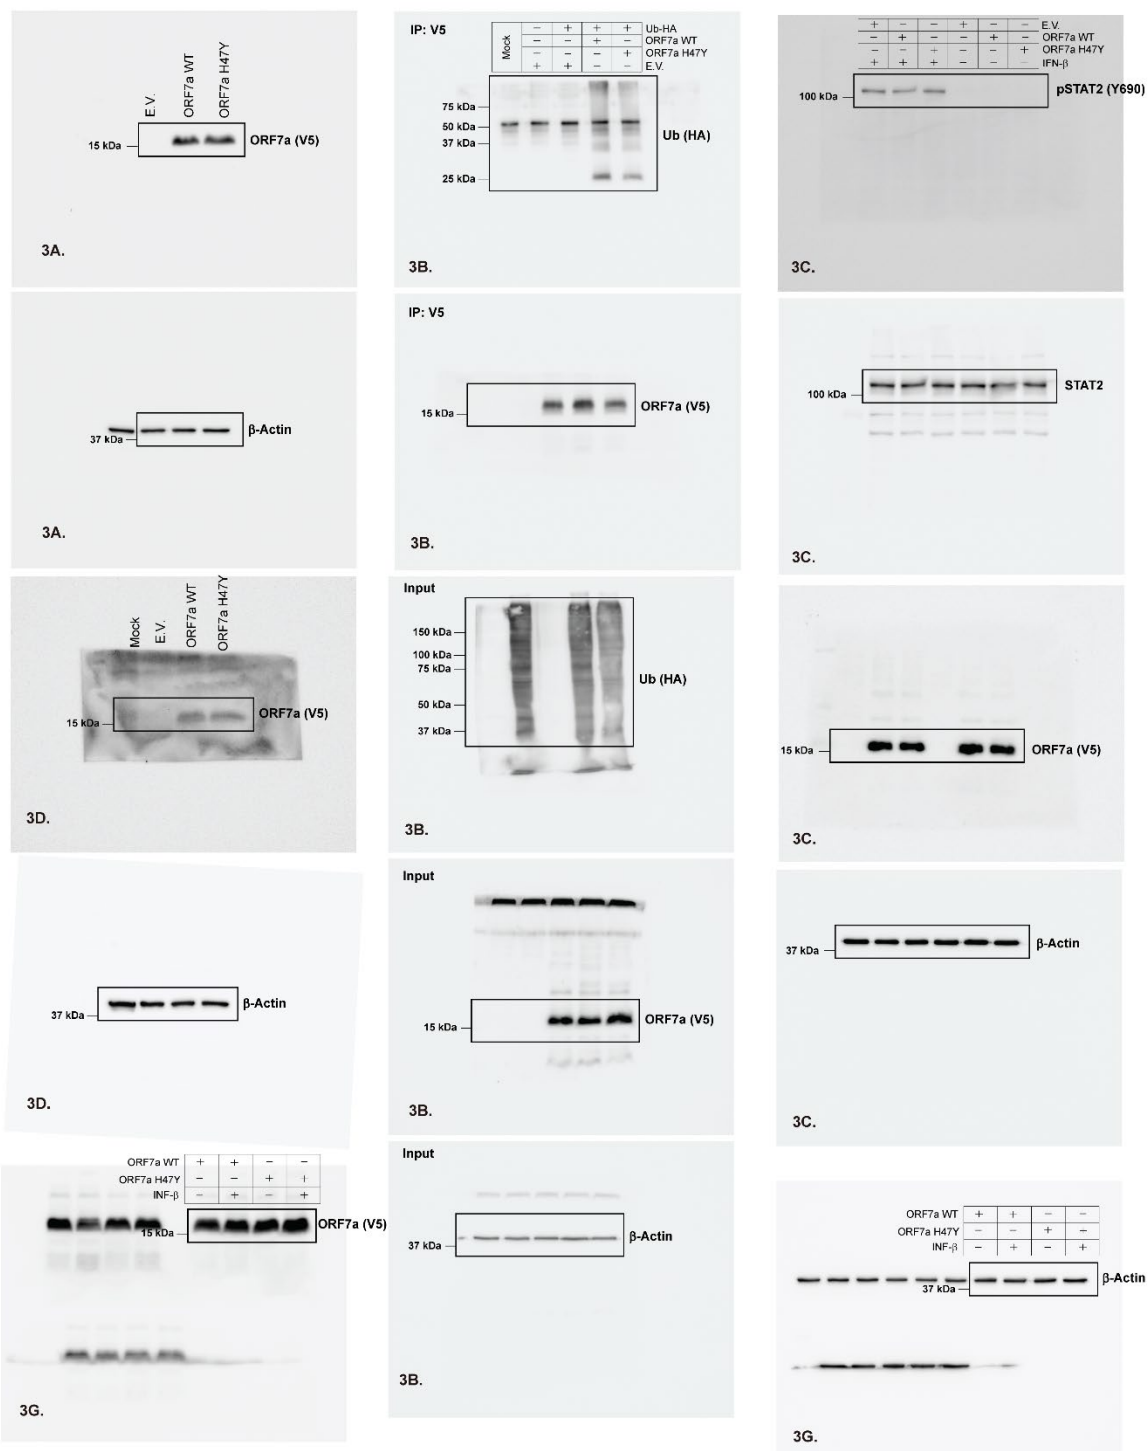

Figure S2: Uncropped immunoblot images for Figure 3.

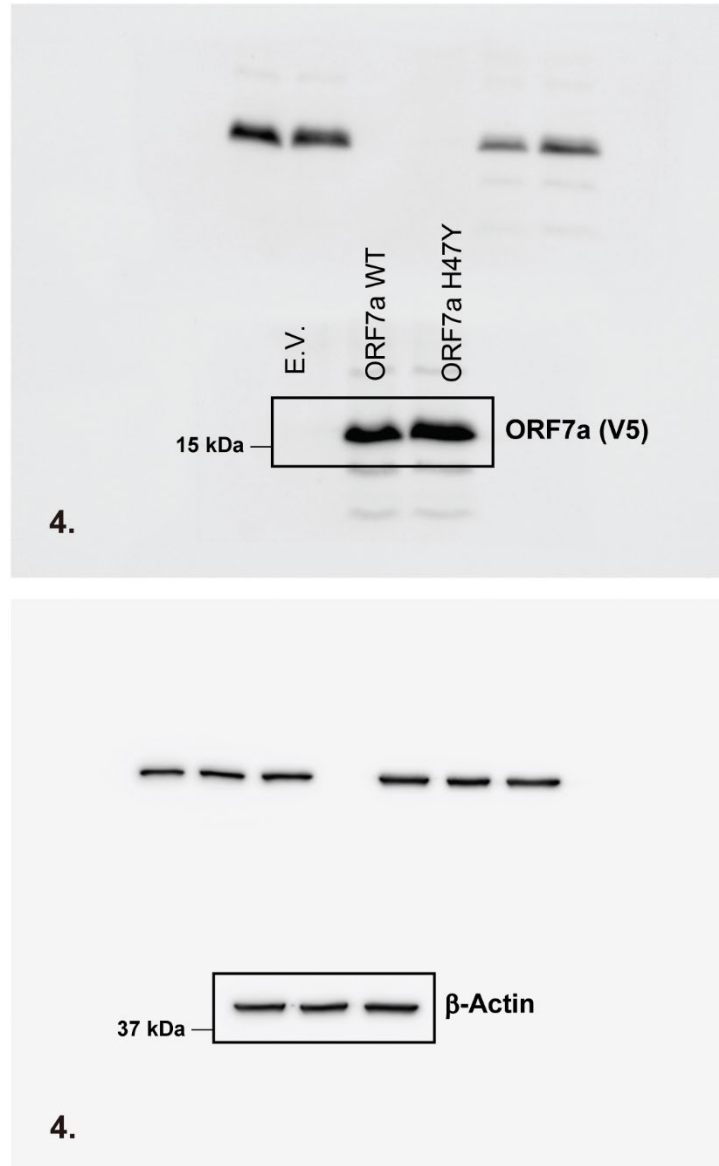

**Figure S3: Uncropped immunoblot images for Figure 4.**

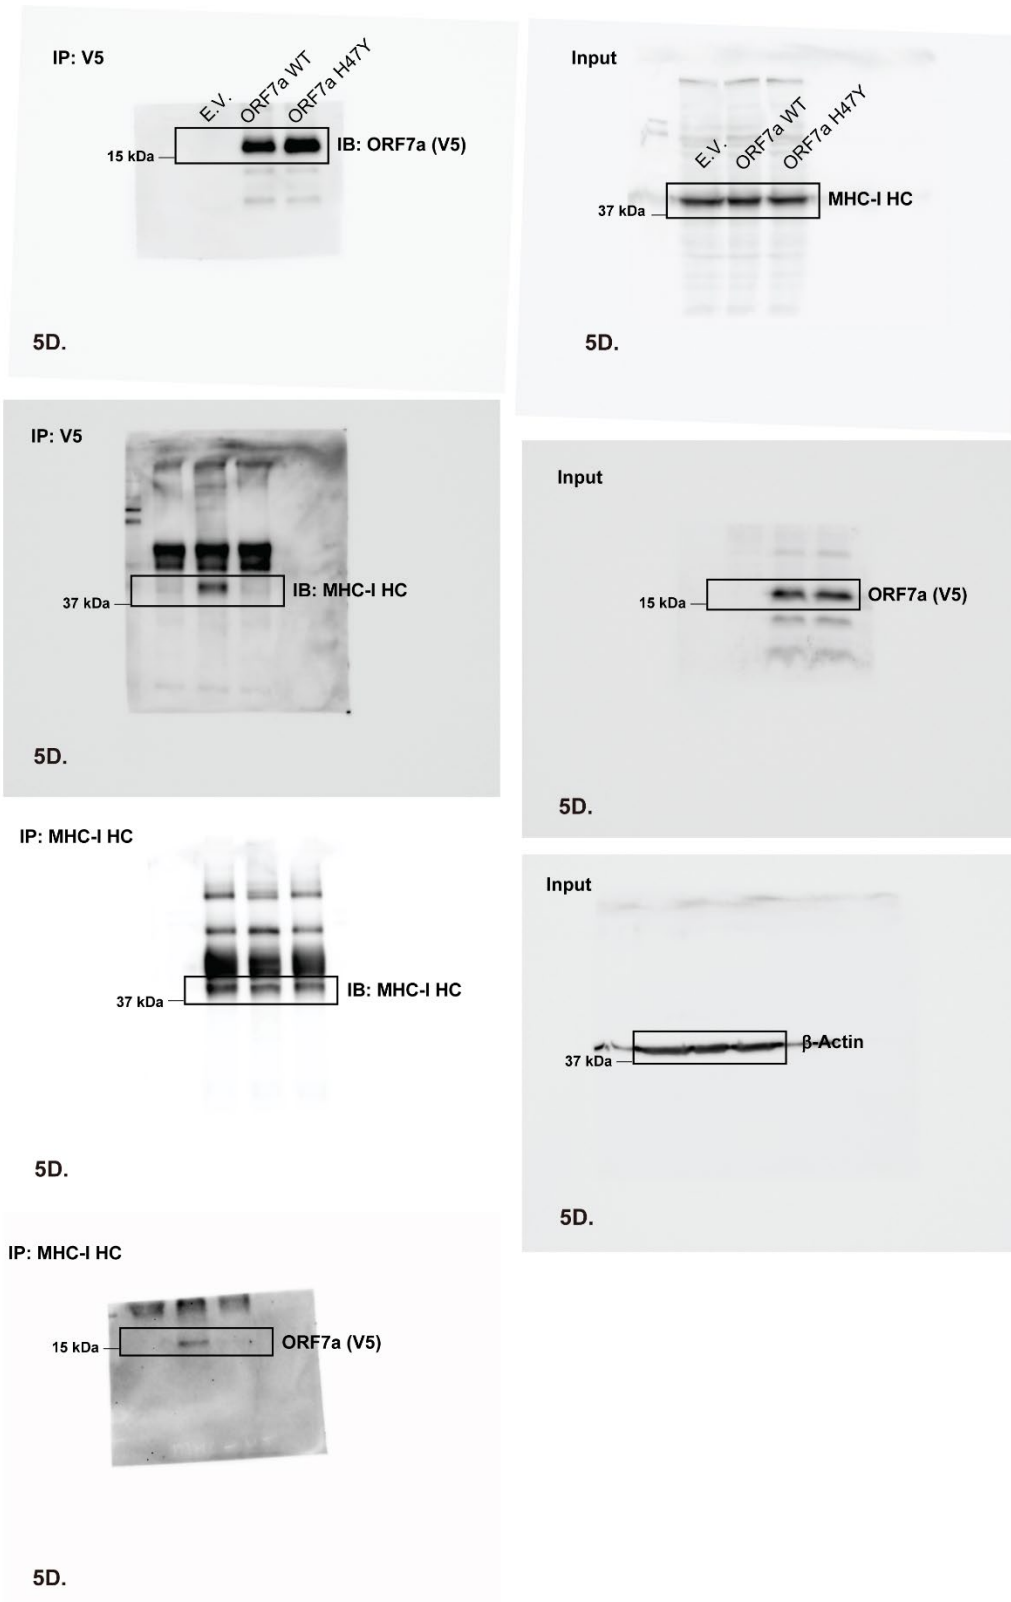

**Figure S4: Uncropped immunoblot images for Figure 5.**
